# Supplementary material
Source: Springer Nature journal article supplement (http://www.springermedizin.de/resource/supplementary/12958_2009_501_MOESM2_ESM.pdf/9568156)
Supplement: MOESM2 [file 9568156]

r<sup>+</sup> SP  
 M T A M P U S T H P R Q R 19  
 agtttc cctttc agtctggg aa cATG AC AGCCAT GC CAGT CT CAACG CATG CC CGTCAG A 60  
  
 R K S Y T F F W C S L G I Y A E A L L F 33  
 GAAGGAAGAGCT AC ACTTTCTT CTGGTGCTCCCT GGGCAT CT AT GCAGAGGCC CTCTCTGT 120  
 r<sup>+</sup> SCR1  
 L L S G L S D A C E L P P P F E A H E L 59  
 TTCTACTGTCTG GTTTATCT GATGCCCTGTGAAC T AC CACC AC CAT TT GAAG CT AT GGAAC 180  
  
 K G T P K L Y Y A U G E R I E F K C K K 79  
 TCAAGG GT ACAC CT AAAC T TATT AT GC AGTTGGAG AGAG AATAG AATTTA AGTGTAAAA 240  
  
 G Y L H L S P N L M I A T C G G P N H T W 99  
 AAGGAT AC CTAC AT CTGTCT CC AAAC CT GATGATTG CTAC CT GTGGGCCAAAT CATACAT 300  
 r<sup>+</sup> SCR2  
 V M I S D V G C I K U Q C T N L Q N P S 119  
 GGGTCC AT ATTT CAGAT GTT GGTGT AT TAAAGTTC AATGTA CTATGTT AC AG AACCTT 360  
  
 F G K U H Y I D G R F S W G A R A K F T 139  
 CATTTG GC AAAGTACACTAC AT AGAT GG CAGATT TT CATG GG GTG CT CGAG CT AATTT A 420  
  
 C H E G Y Y L A G H S V L M C V L K G D 159  
 CTT GTATG GAAG GT TATTACTT AGCT GGTATGT CAGTT CT AC ACT GT GTGCTT AAAGGT G 480  
 r<sup>+</sup> SCR3  
 E A Y M N G M P P S C E K U Y C L P P P 179  
 ATG AGG CAT ACT GG AAT GGC CAT CCC CC AAGTT GTG AAAA GGT TT AT TGT TACCACCT C 540  
  
 K I K N G T H T F T D I N U P K Y H E A 199  
 CAAAATAAAAA AT GGAACA CACACCTT TACTGATAT AATGTAT TC AAT AC CATGAAG 600  
  
 V I Y S C D P N P G P D K F S L U G T S 219  
 CAGT AATTTACAGT TGTGAT CCTAAC CC AGGGCC AG AT AAGT TT TCC CTTGTT GGGACAA 660  
 r<sup>+</sup> SCR4  
 V L F C A G Q N T W S N S P P E C K U V 239  
 GCGTGC TATTCT GT GCTGGC CAGAAC AC CTGGAGTA ACAG CC CTC CAGAGT GT AAAGTGG 720  
  
 K C P F P V L Q N G R Q I S R A G E K F 259  
 TAAAT GT CCAT TT CCAGTG CT ACAAAAT GGAAG AC AGAT AT CAAGA GCTG GAGAAAAGT 780  
  
 S V Q A I V N P E C U Q G F Y H E G S S 279  
 TTT CCT AT CAAG CAATAGTG AT GTTT GAGTGTGT GC AGGG AT TTT AC AT GG AAGG CAGT A 840  
 r<sup>+</sup> UK  
 H U V C S A N N S W E P S I P K C L K G 299  
 GCATGGTG GT CT GT AGT GCT AATAACTCTTGGGAGC CATCTATCC CAAAAT GT CTTAAAG 900  
 r<sup>+</sup> TH  
 Y P N P R G G I F G Q E L D A W I V A L 319  
 GAT ATC CT AATC CC CGT GGA GG AAT ATT TGGCC AAG AATT AG ATG CATGGATT GTTGCTT 960  
  
 I U I T S I U G V F V I C L I H L R 331  
 TGATTGTT ATTA CT TCAATT GTTGGAGT TTTTGT AATTTGTCTC ATC ATGCTC AGG 1018

r<sup>+</sup> CYT-A  
 Y F E H R K K G N U S A A R . 345  
 TATTT GAGCAC AG GAAGAA AG GAAATGTATCTG CAGCAAGATGA ab atcc catgtgbyg 1078  
 aagtcatc actggt ccattttt gaaa ac tggatcct caagtc tggca aagca aatbtgt 1138  
 atatc tgc agga gctt cgtt tgtggt aatgtgtgtgtgtt tcc tagtgt aatg aatct g 1198  
 tgtt aaaaaa 1208

r<sup>+</sup> CYT-B  
 Y F E H R K K G C Q S Q A Q L F Y L C F 351  
 TATTT GAGCAC AG GAAGAA AG GATG CC AGTCCC AAGCTCAATTATTTTAC CT GTGCCT C 1078  
 -  
 TGAccc ac caactatabaagaa ct gbat ct gc agca ag atga ab ab ccc atgtg byg aagt c 1138  
 atact gbtccatt tttgaaa actgg ab cttcaag ctbggcaaaagc aaaaab gbat ab c 1198  
 tgc agg ag ctbc gt ttgtggta atgt gt ggtgtt ct agtgtba aab g aatc tgtgtt 1258  
 aaaaac a 1269
